# Supplementary material
Source: MDPI journal article supplement (https://www.mdpi.com/2073-4441/12/2/390)
Supplement: s1 [file s1]

Supplementary material

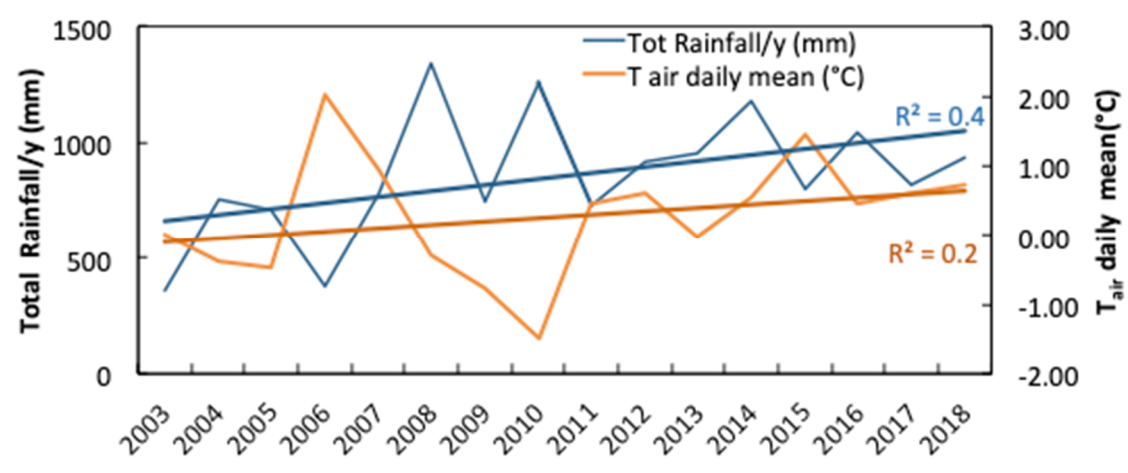

**Supplementary Figure S1:** Total rainfall (blue) and daily air temperature (orange) historical series from the 2003 to the 2018 at the “Careser Diga” meteorological station (2600 m a.s.l.). Data were provided by [50,51].
